# Supplementary material for: Er3+-Activated NaLaMgWO6 double perovskite phosphors and their bifunctional application in solid-state lighting and non-contact optical thermometry
Source: Royal Society of Chemistry journal article supplement (doi:10.1039/c9dt00315k), 2019-01-01

**Er<sup>3+</sup>-activated NaLaMgWO<sub>6</sub> double perovskite phosphor and its  
bifunctional application in solid-state lighting and non-contact  
optical thermometry**

Weiguang Ran<sup>a</sup>, Hyeon Mi Noh<sup>a</sup>, Sung Heum Park<sup>a</sup>, Bo Ram Lee<sup>a</sup>, Jung Hwan Kim<sup>a</sup>,  
Jung Hyun Jeong<sup>a\*</sup>, Jinsheng Shi<sup>b</sup>

<sup>a</sup> Department of Physics, Pukyong National University, Busan 608-737, South Korea.

<sup>b</sup> Department of Chemistry and Pharmaceutical Science, Qingdao Agricultural University, Qingdao 266109, People's Republic of China.

**Table S1.** The lattice parameters of the NaLaMgWO<sub>6</sub> doped with different Er<sup>3+</sup> ions concentrations.

| Concentration (%) | a (Å)  | b (Å)  | c (Å)  | β (degree) | V(Å <sup>3</sup> ) |
|-------------------|--------|--------|--------|------------|--------------------|
| 0                 | 5.5204 | 5.5242 | 7.8876 | 90.0464    | 240.5386           |
| 0.5               | 5.5221 | 5.5239 | 7.8857 | 90.0313    | 240.5374           |
| 1                 | 5.5207 | 5.5233 | 7.8886 | 90.0458    | 240.5404           |
| 2                 | 5.5192 | 5.5247 | 7.8879 | 90.0273    | 240.5147           |
| 3                 | 5.5205 | 5.5237 | 7.8874 | 90.0382    | 240.5176           |
| 4                 | 5.5184 | 5.5212 | 7.8856 | 90.0187    | 240.2597           |
| 5                 | 5.5177 | 5.5251 | 7.8865 | 90.0347    | 240.4251           |

**Figure S1.** The distribution of ground electrons in the NaLaMgWO<sub>6</sub> host.

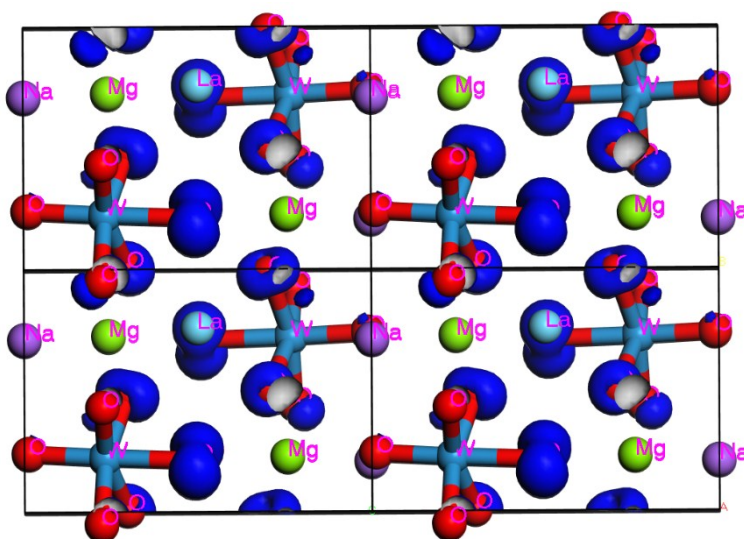

**Figure S2.** Vibrational vector of atoms in NaLaMgWO<sub>6</sub> host.

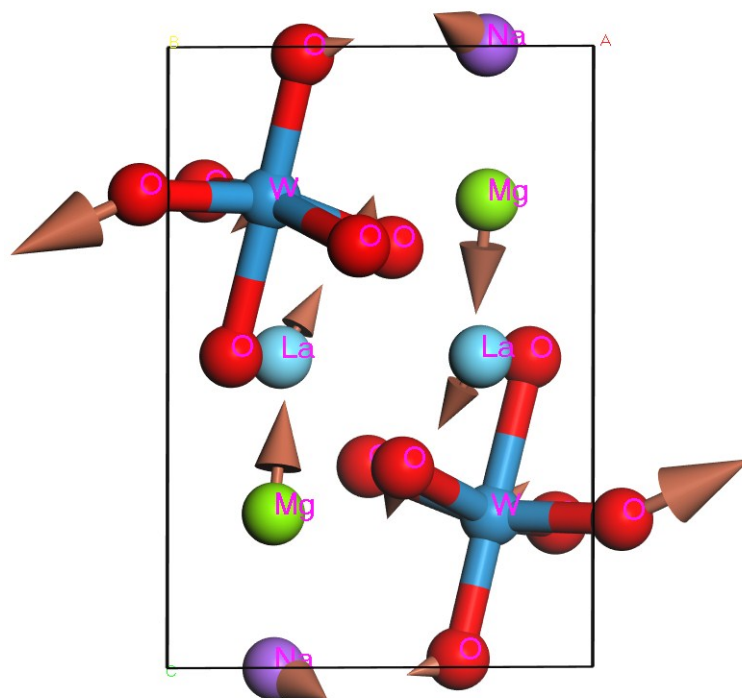

**Figure S3.** Raman spectra of NaLaMgWO<sub>6</sub> phosphor.

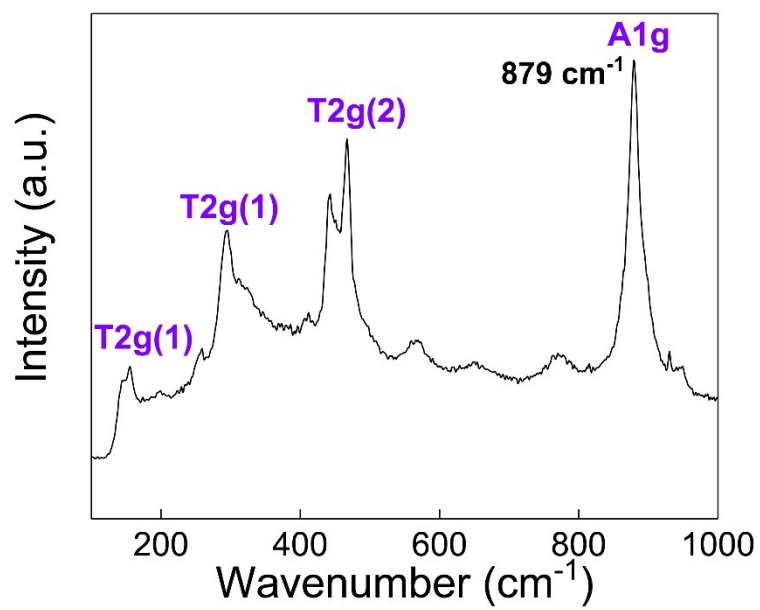

Supplement: c9dt00315k1.pdf [file c9dt00315k1.pdf]
